# Supplementary material
Source: PubMed Central journal article supplement (PMC4031539)

**SUPPLEMENTARY MATERIAL (RUNX1 regulates PU.1 corepressor/coactivator exchange)**

**Contents:**

**Figure S1: Tandem mass spectrometry (MS/MS) spectrum of single peptide identification. Respective b and y'' ions are indicated.**

ACL6A IP exp3 PUERshRUNX1 VDFPTAIGVVLER, m/z 708.39 (2+)

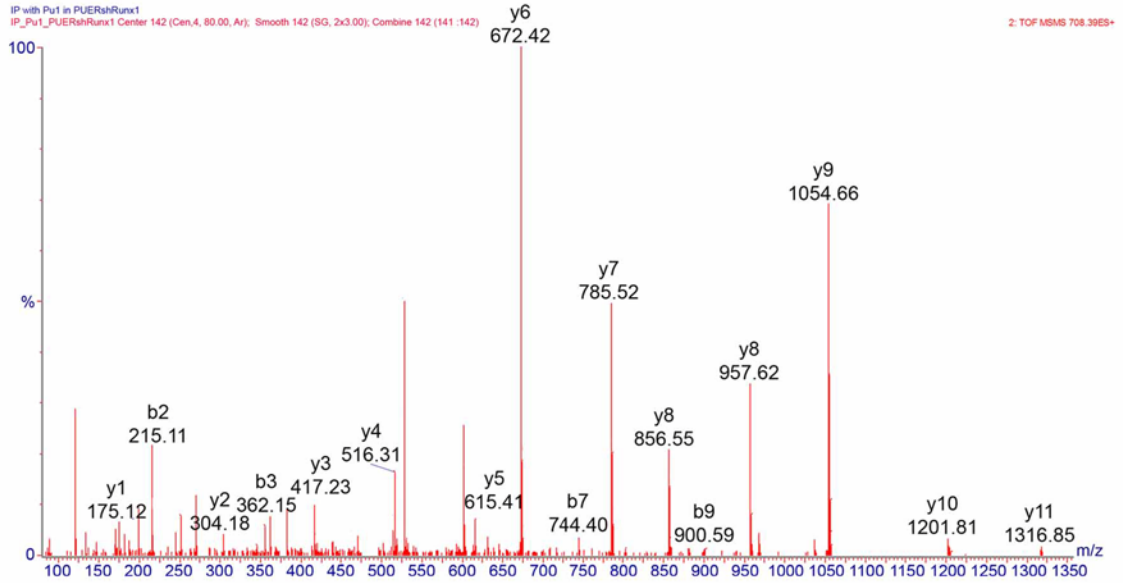

ANM1 IP exp1 PUER ATLYVTAIEDR, m/z 626.49 (2+)

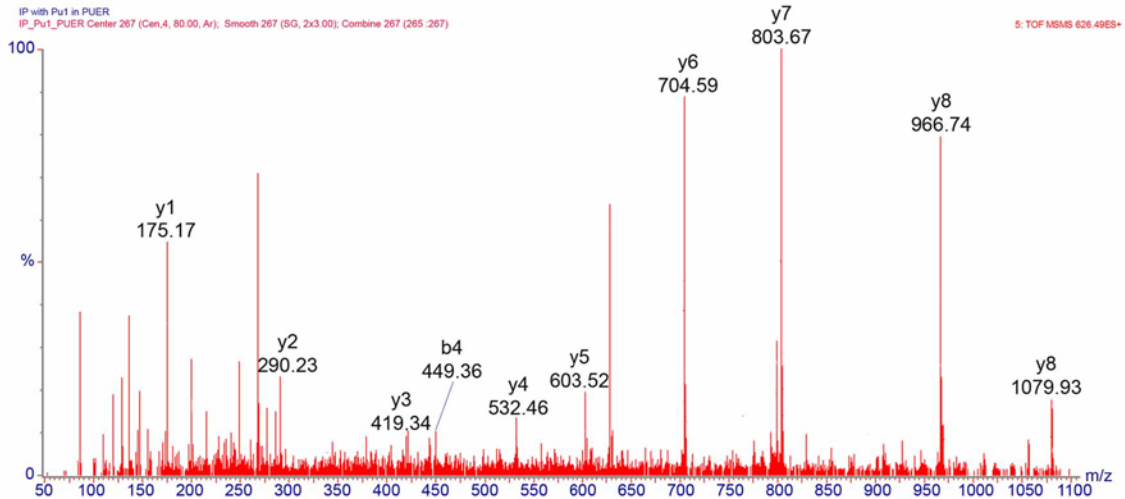

ANM5 IP exp1 PUER AAILPTSIFLTNK, m/z 695.09 (2+)

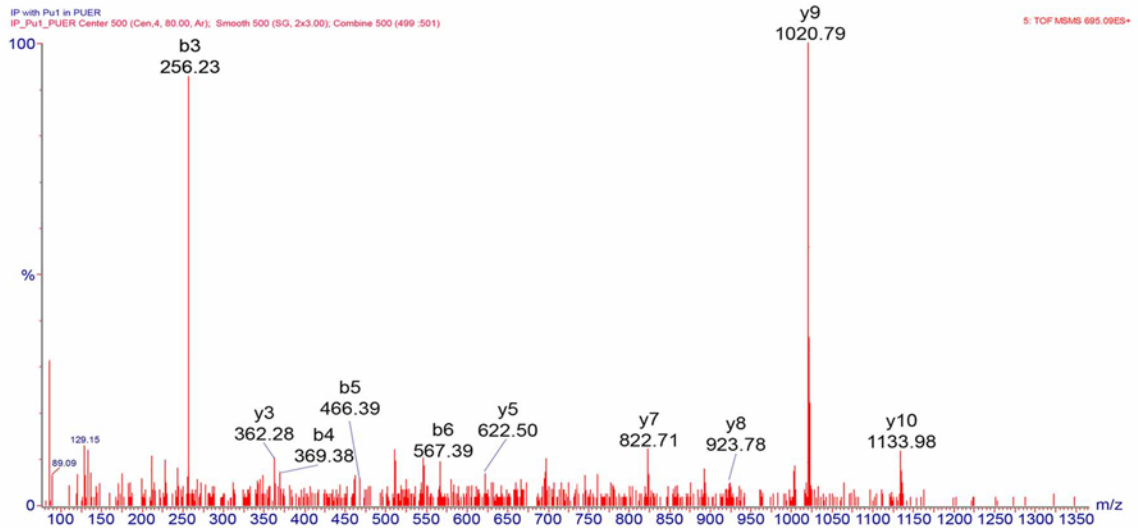

# EP400 IP exp3 PUER DITEVTAVAEAILPK, m/z 785.45 (2+)

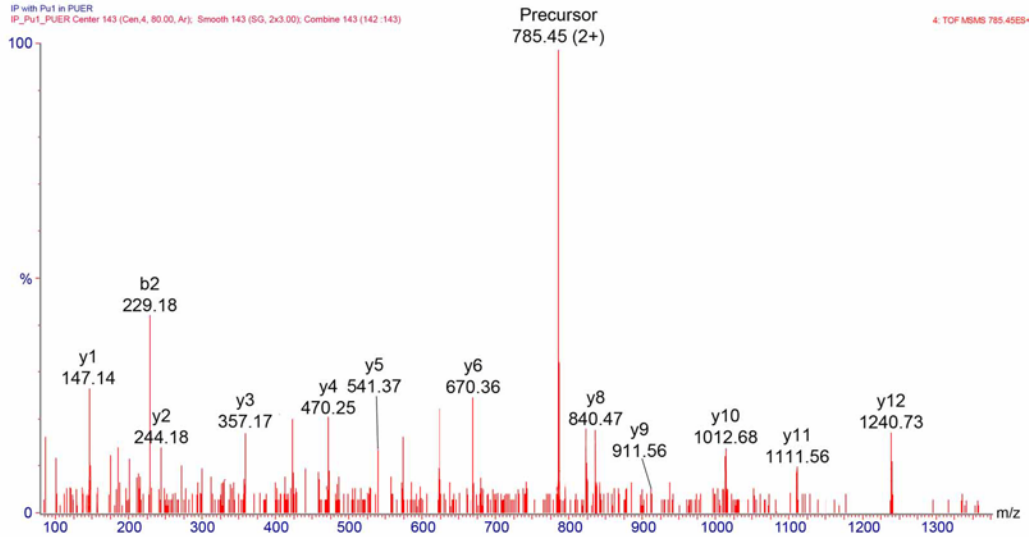

# HAT1 IP exp1 PUER YYTEFPTVLDITAEDPSK, m/z 1045.28 (2+)

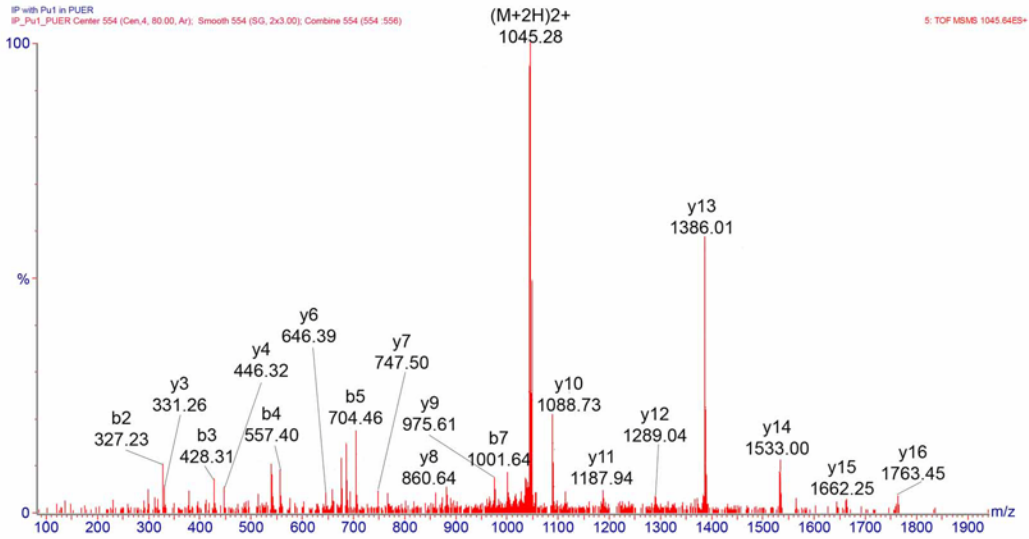

# HDAC2 IP exp1 PUER TFNLPLLM(ox)LGGGGYTIR, m/z 919.98

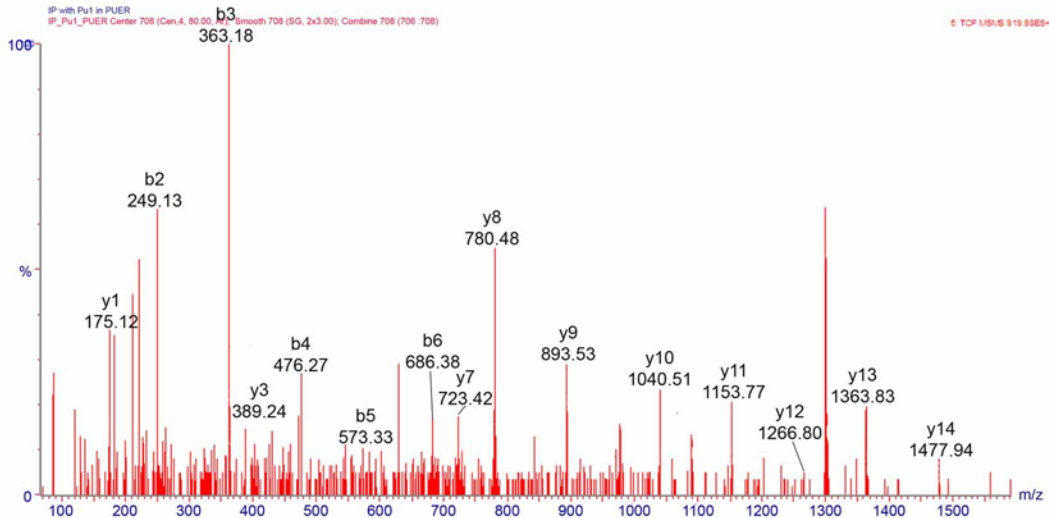

MBD3 IP exp3 PUERshRUNX1 LSGLSAFDIAEELVR, 810.50 (2+)

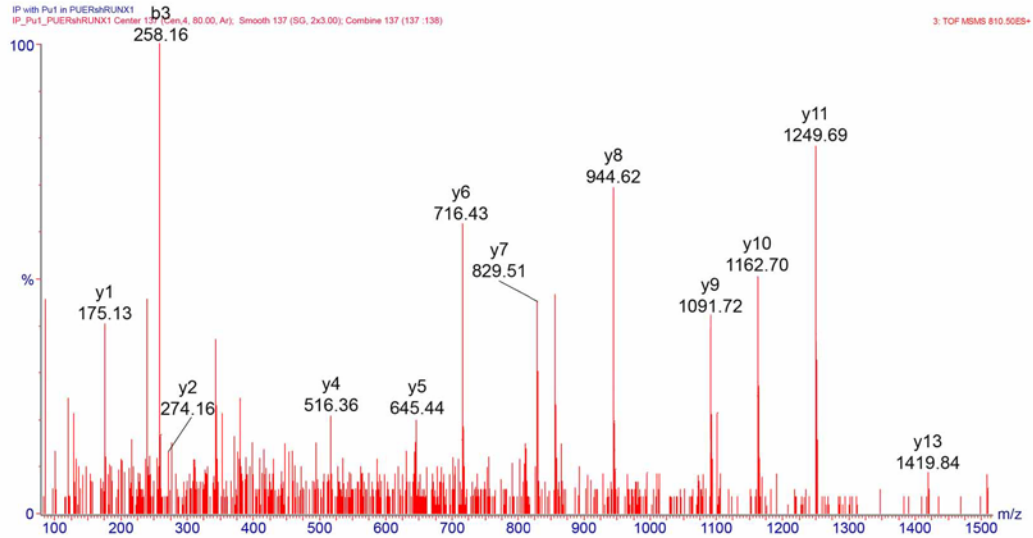

NCOA5 IP exp3 PUER MANADEAILQER, m/z 596.28 (3+)

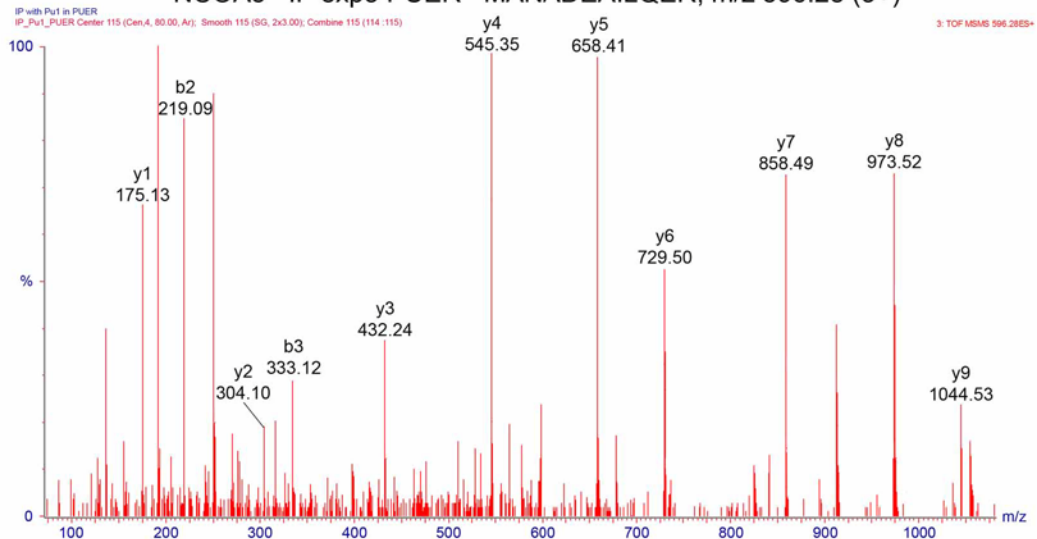

RBBP4 IP exp3 PUERshRUNX1 TVALWDLR, 487.27 (2+)

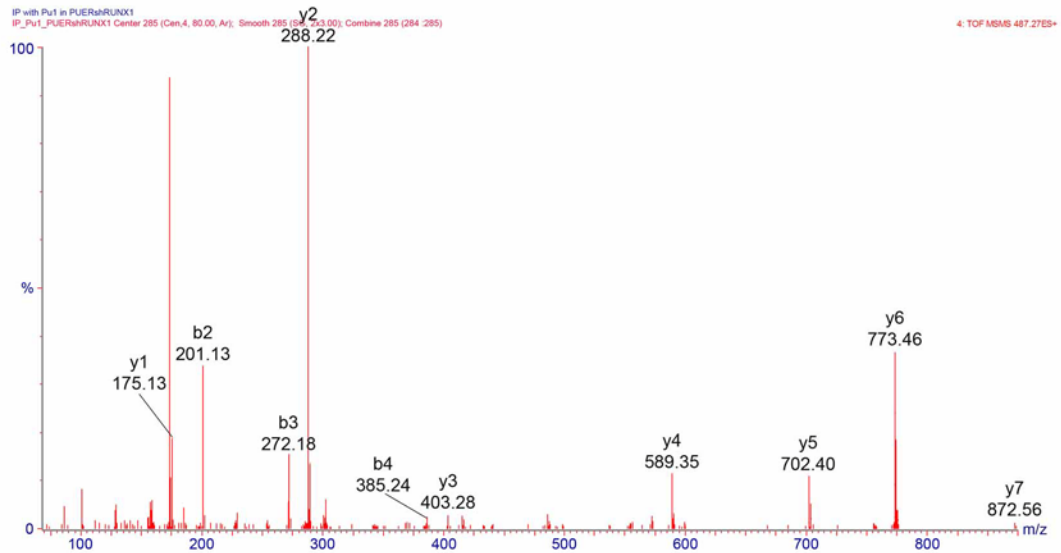

### RBBP7 IP exp1 PUER YM(ox)PQNPHIATK m/z 476.24 (3+)

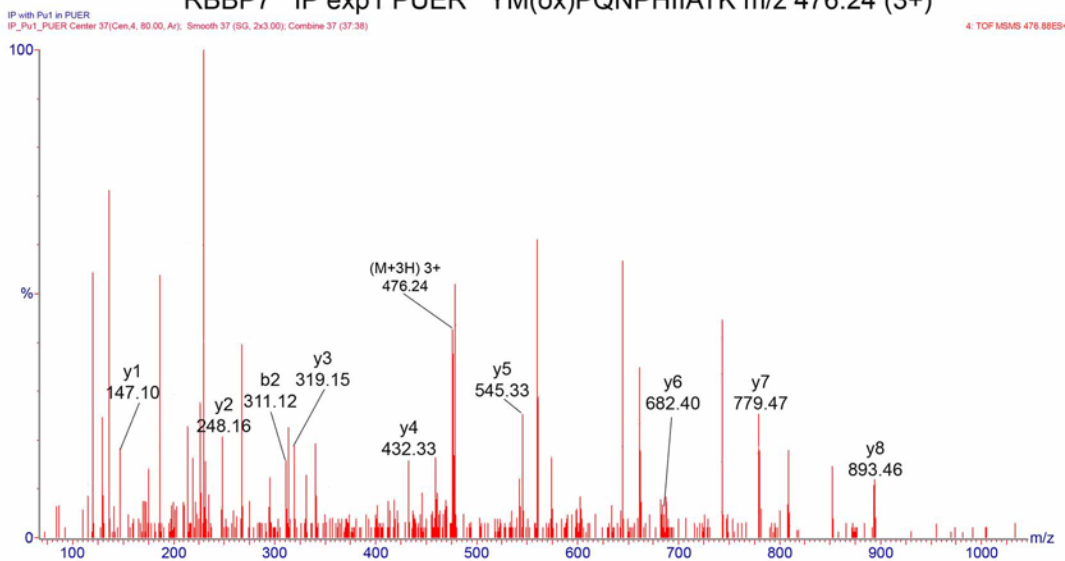

### RUVB1 IP exp3 PUERshR ALESSIPIVIFASNR, m/z 844.44 (2+)

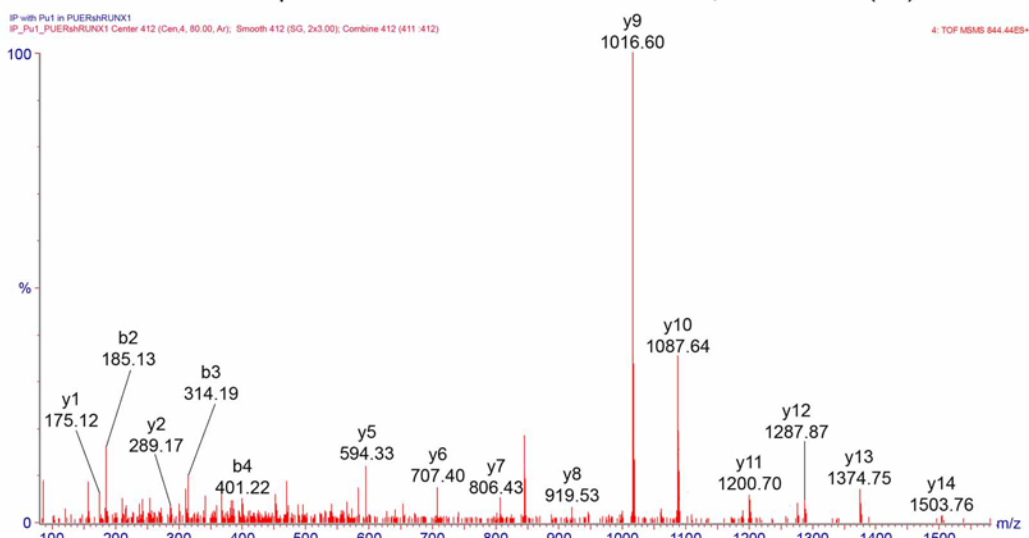

### RUVB2 IP exp3 PUERshRUNX1 QASQGMVGQLAAR, m/z 666.82 (3+)

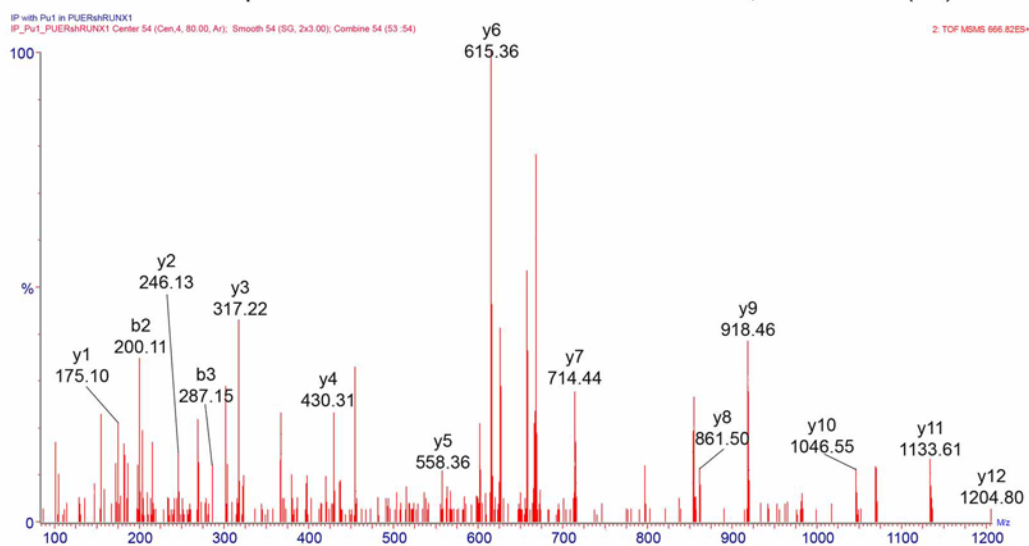

SMARCA2 IP exp3 PUER VDLNEEETILIIR, m/z 799.08 (2+)

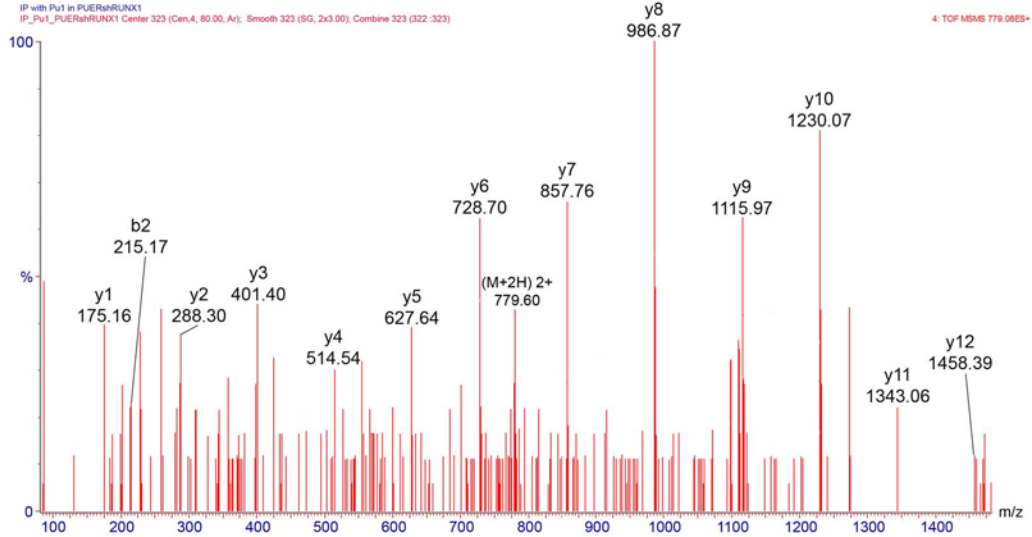

SMARCE1 IP exp1 PUER LISELSESVVPDVR, m/z 828.51 (2+)

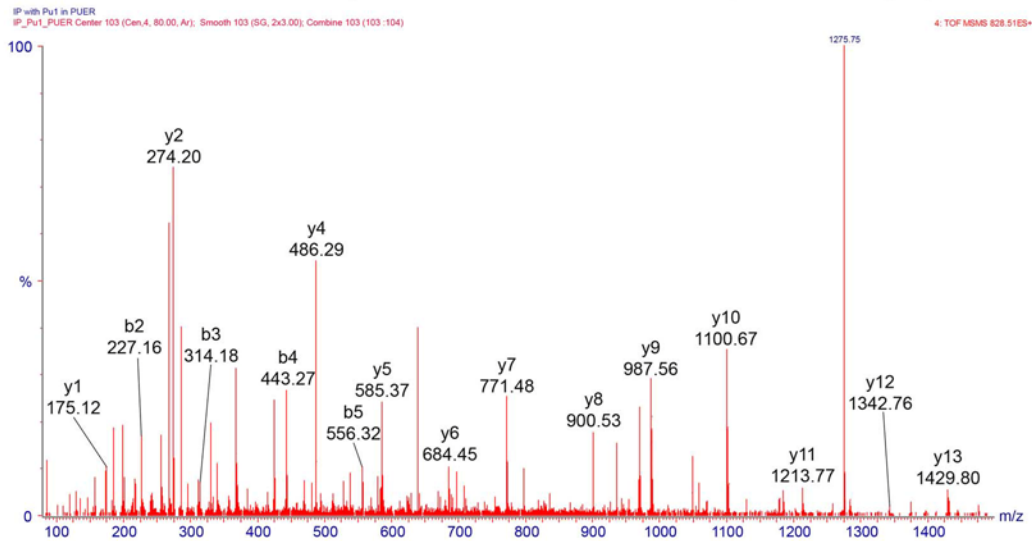

SMARCD1 IP exp1 PUER LDIQEALK, m/z 465.37 (2+)

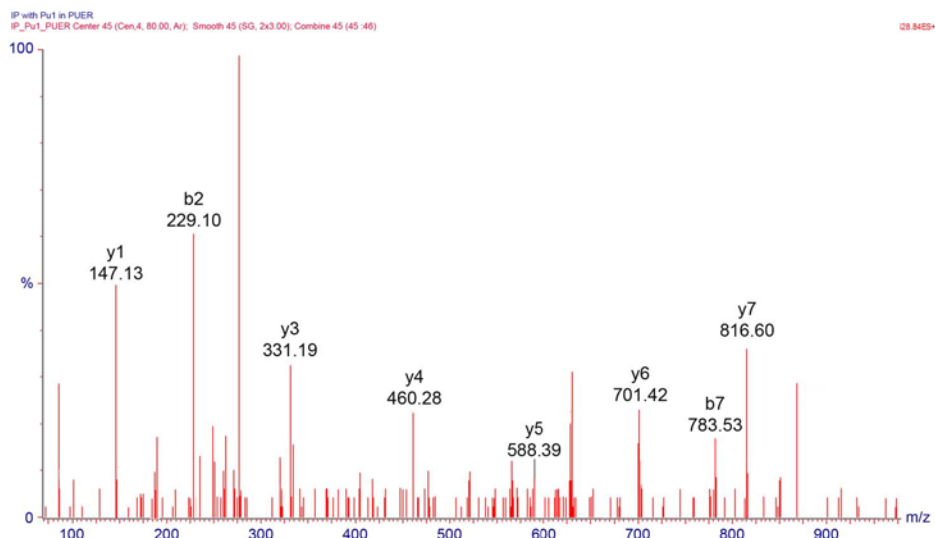

SMARCD2 IP exp1 PUER IYISNTFSPSK, m/z 628.93 (2+)

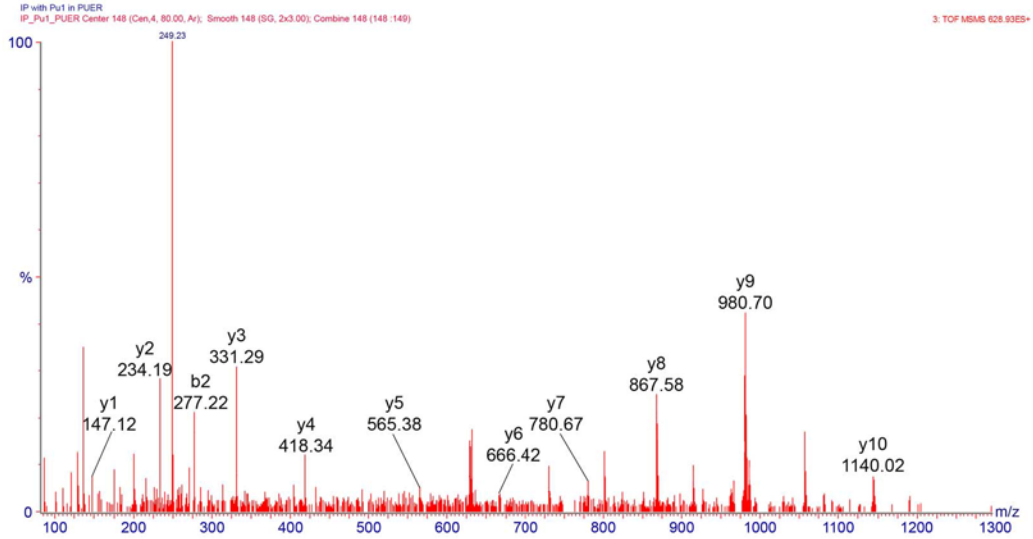

SNF5 IP exp3 PUER AVSISTEPPTYLR, m/z 717.39 (2+)

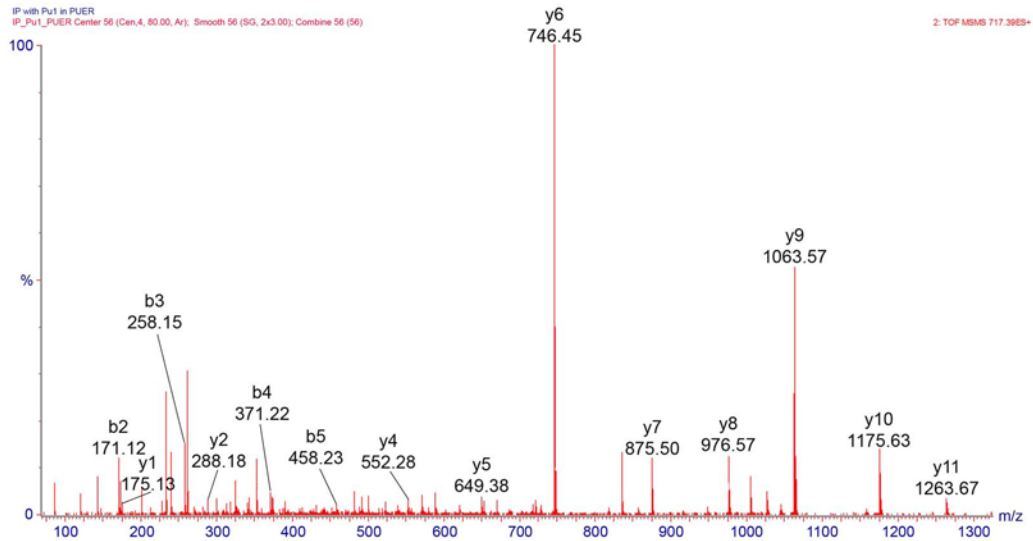

SNF5 IP exp3 PUER AVSISTEPPTYLR, m/z 717.39 (2+)

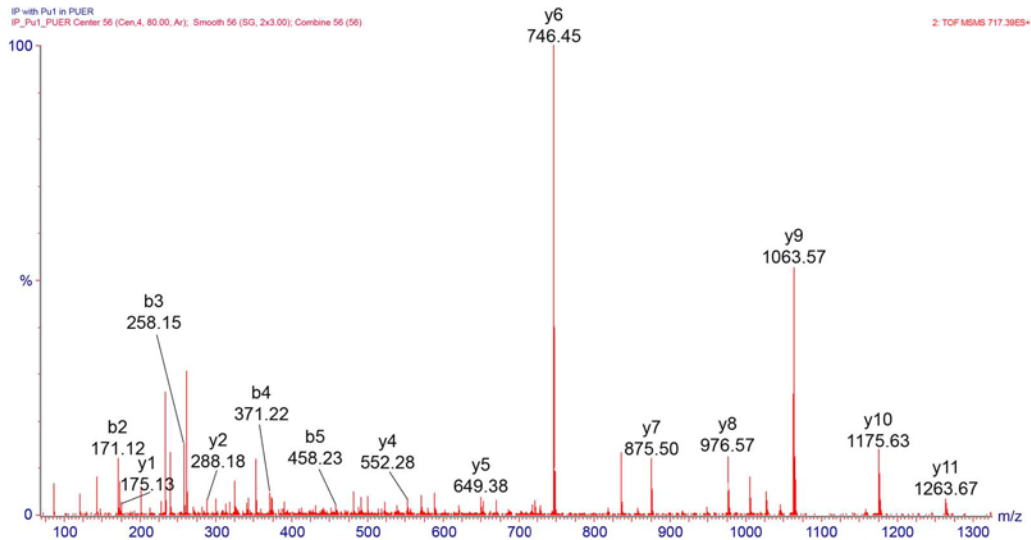

DMAP1 IP exp3 PUER LITAADTTAEQR, m/z 645.34 (2+)

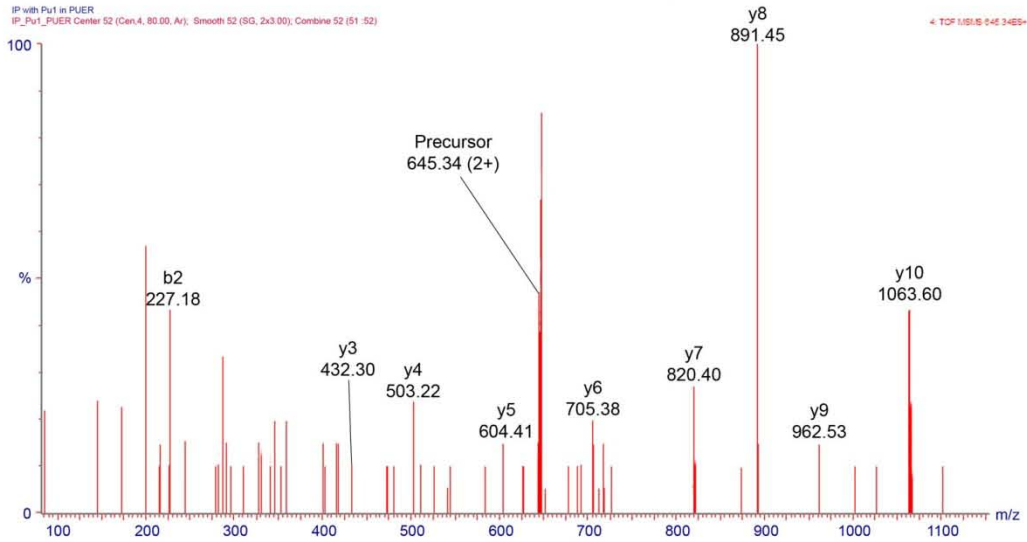

SATB1 IP exp3 PUER LGSTGAKMQGVPLK, m/z 468.35 (2+)

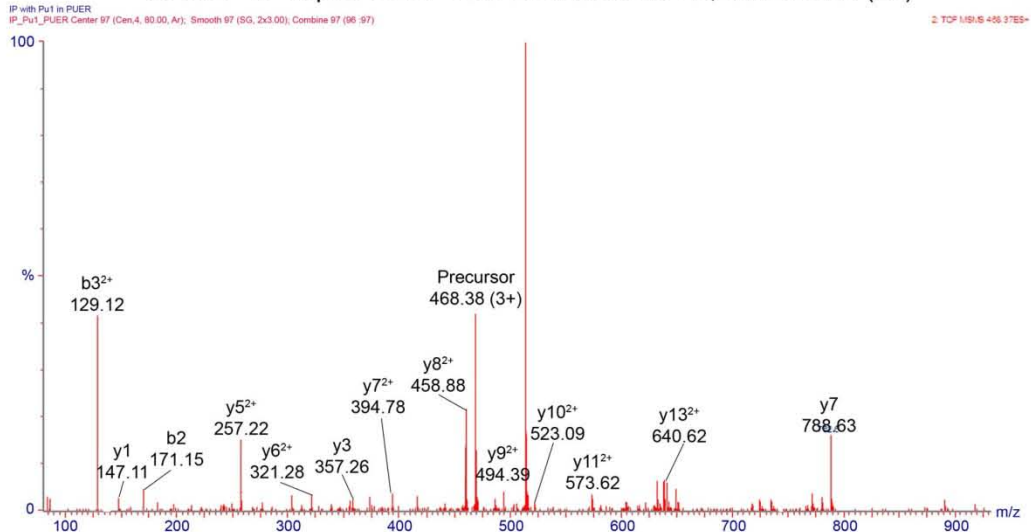

SATB2 IP exp3 PUER TQGLLSEILR, m/z 461.34 (2+)

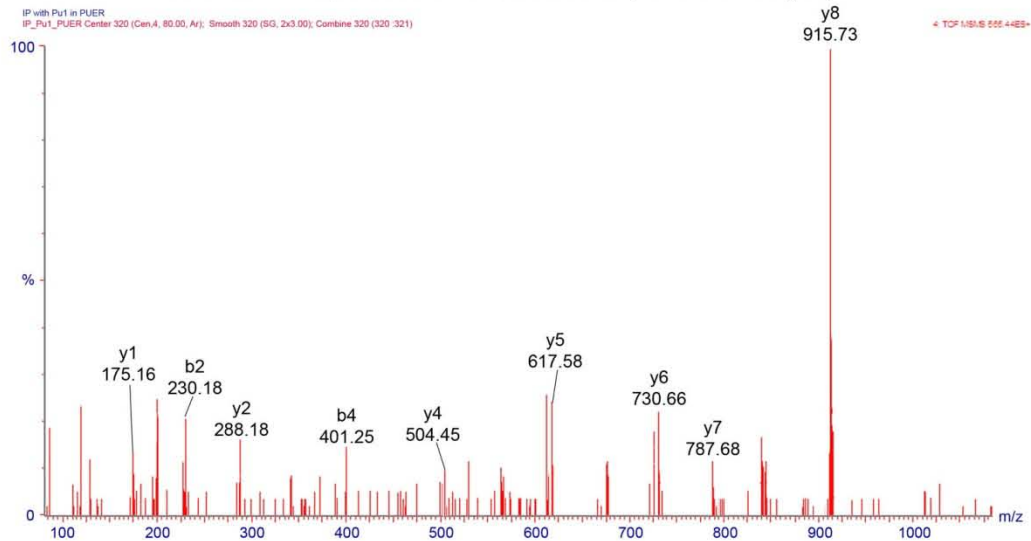



CARM1 IP exp1 PUER QPVVDTFDIR, m/z 595.45 (2+)

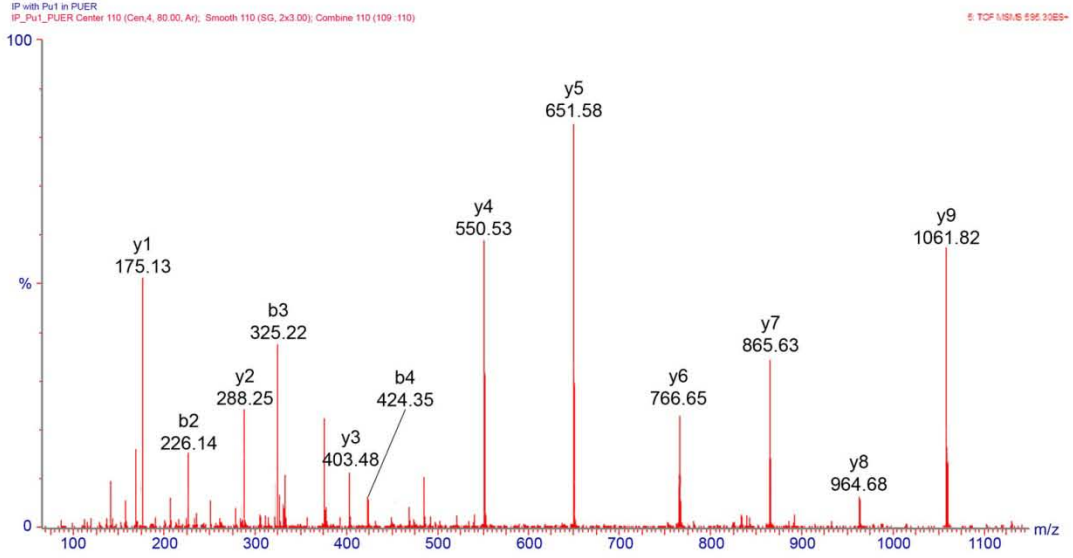

Supplement: supp_M114.562447_jbc.M114.562447-5.pdf [file supp_M114.562447_jbc.M114.562447-5.pdf]
